# Supplementary material
Source: HighWire-hosted journal article supplement (https://bmjopen.bmj.com/content/12/7/e058172)
Supplement: inline-supplementary-material-1 [file inline-supplementary-material-1.pdf]

eTable 1 The list of Community Health Service Centers

| <b>Number</b> | <b>Institution</b>                                 | <b>District</b>      |
|---------------|----------------------------------------------------|----------------------|
| 1             | Jianguomen Community Health Service Center         | Dongcheng District   |
| 2             | Hepingli Community Health Service Center           | Dongcheng District   |
| 3             | Shichahai Community Health Service Center          | Xicheng District     |
| 4             | Yuetan Community Health Service Center             | Xicheng District     |
| 5             | Sunhe Community Health Service Center              | Chaoyang District    |
| 6             | Cuigezhuang Second Community Health Service Center | Chaoyang District    |
| 7             | Nanyuan Community Health Service Center            | Fengtai District     |
| 8             | Dahongmen Community Health Service Center          | Fengtai District     |
| 9             | Jindingjie Community Health Service Center         | Shijingshan District |
| 10            | Guangning Street Community Health Service Center   | Shijingshan District |
| 11            | Qinglongqiao Community Health Service Center       | Haidian District     |
| 12            | Malanwa Community Health Service Station           | Haidian District     |
| 13            | Tianzhu Community Health Service Center            | Shunyi District      |
| 14            | Zhaoquanying Community Health Service Center       | Shunyi District      |
| 15            | Yongshun Community Health Service Center           | Tongzhou District    |
| 16            | Taihu Community Health Service Center              | Tongzhou District    |
| 17            | Xihongmen Community Health Service Center          | Daxing District      |
| 18            | Changziying Community Health Service Center        | Daxing District      |
| 19            | Liangxiang Community Health Service Station        | Fangshan District    |
| 20            | Changyang Community Health Service Center          | Fangshan District    |

|    |                                               |                    |
|----|-----------------------------------------------|--------------------|
| 21 | Junzhuang Community Health Service Center     | Mentougou District |
| 22 | Zaitang Community Health Service Center       | Mentougou District |
| 23 | Shahe Community Health Service Center         | Changping District |
| 24 | Huilongguan Community Health Service Center   | Changping District |
| 25 | Huangsongyu Community Health Service Center   | Pinggu District    |
| 26 | Yukou Community Health Service Center         | Pinggu District    |
| 27 | Henanzhai Community Health Service Center     | Miyun District     |
| 28 | Mujianyu Community Health Service Center      | Miyun District     |
| 29 | Yangsong Community Health Service Center      | Huairou District   |
| 30 | Miaocheng Community Health Service Center     | Huairou District   |
| 31 | Zhangshanying Community Health Service Center | Yanqing District   |
| 32 | Yongning Community Health Service Center      | Yanqing District   |
